# Supplementary material for: Is costly punishment altruistic? Exploring rejection of unfair offers in the Ultimatum Game in real-world altruists
Source: PubMed Central journal article supplement (PMC4704064; doi:10.1038/srep18974), 2016-01-07

**Is costly punishment altruistic? Exploring rejection of unfair offers in the  
Ultimatum Game in real-world altruists**

**Kristin M. Brethel-Haurwitz<sup>1,\*</sup>, Sarah A. Stoycos<sup>1,+</sup>, Elise M. Cardinale<sup>1</sup>, Bryce  
Huebner<sup>2</sup>, and Abigail A. Marsh<sup>1</sup>**

<sup>1</sup>Department of Psychology, Georgetown University, Washington, DC 20057, USA.

<sup>2</sup>Department of Philosophy, Georgetown University, Washington, DC 20057, USA.

\*kb527@georgetown.edu

<sup>+</sup>S.A.S. is now at University of Southern California.

## Figure Legends

**Figure S1. Mean rejection rates broken down by fairness and education.** Given the difference in education level between groups, education and its interaction with fairness were added to the model in which group, fairness, and a group x fairness interaction predicted rejection rates. The main effect of education was marginally significant,  $\chi^2(1) = 3.77, p = .052$ , in which a higher education was associated with less rejection overall,  $p = .059$ . In an interaction between education and fairness,  $\chi^2(2) = 22.20, p < .001$ , those with a higher education were less likely to reject very unfair offers,  $p = .001$ . **\*\* $p < .01$** . Error bars represent 95% confidence intervals, based on the SEM.

**Figure S2. Descriptive ratings of altruistic kidney donation, costly punishment, and SRA items.** In an a separate online sample, altruistic kidney donation is rated as significantly less descriptively normative than both costly punishment,  $t(99) = 11.33, p < .001$ , and the average rating for SRA behaviours,  $t(99) = 13.63, p < .001$ . Costly punishment is rated as more descriptively normative than SRA behaviours,  $t(99) = 2.65, p = .005$ .

**Figure S3. Prescriptive ratings of altruistic kidney donation, costly punishment, and SRA items.** In an a separate online sample, altruistic kidney donation is rated as significantly less prescriptively normative than both costly punishment,  $t(99) = 4.75, p < .001$ , and the average rating for SRA behaviours  $t(99) = 10.06, p < .001$ .

**Figure S1**

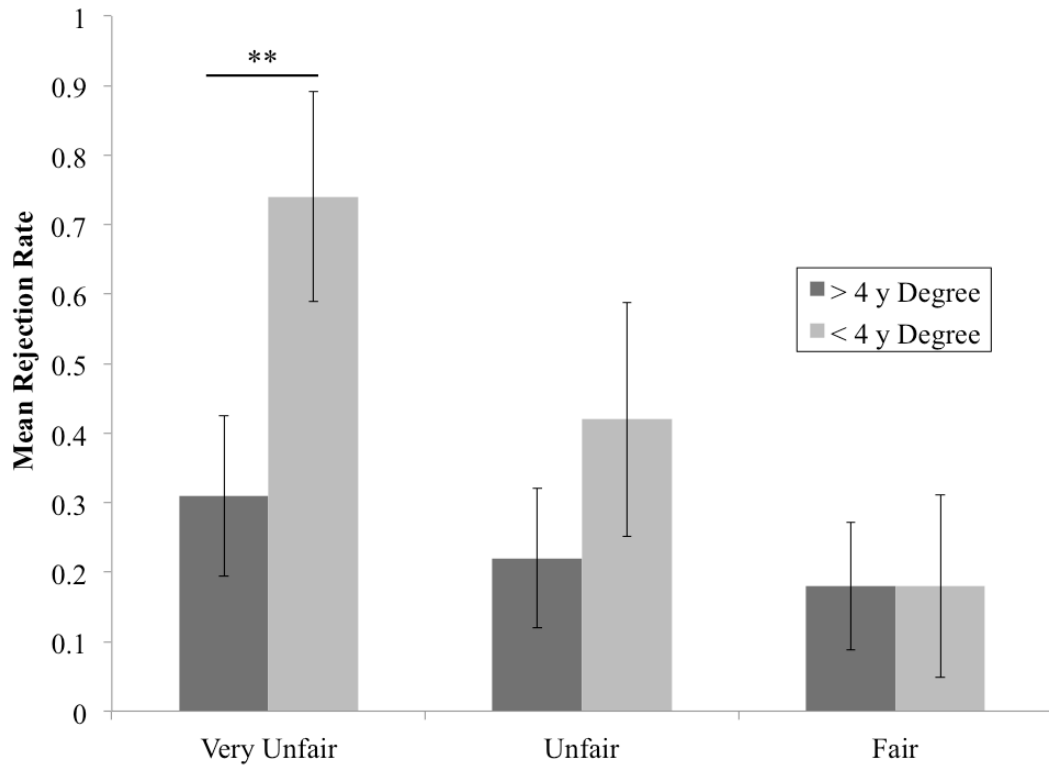

**Figure S2**

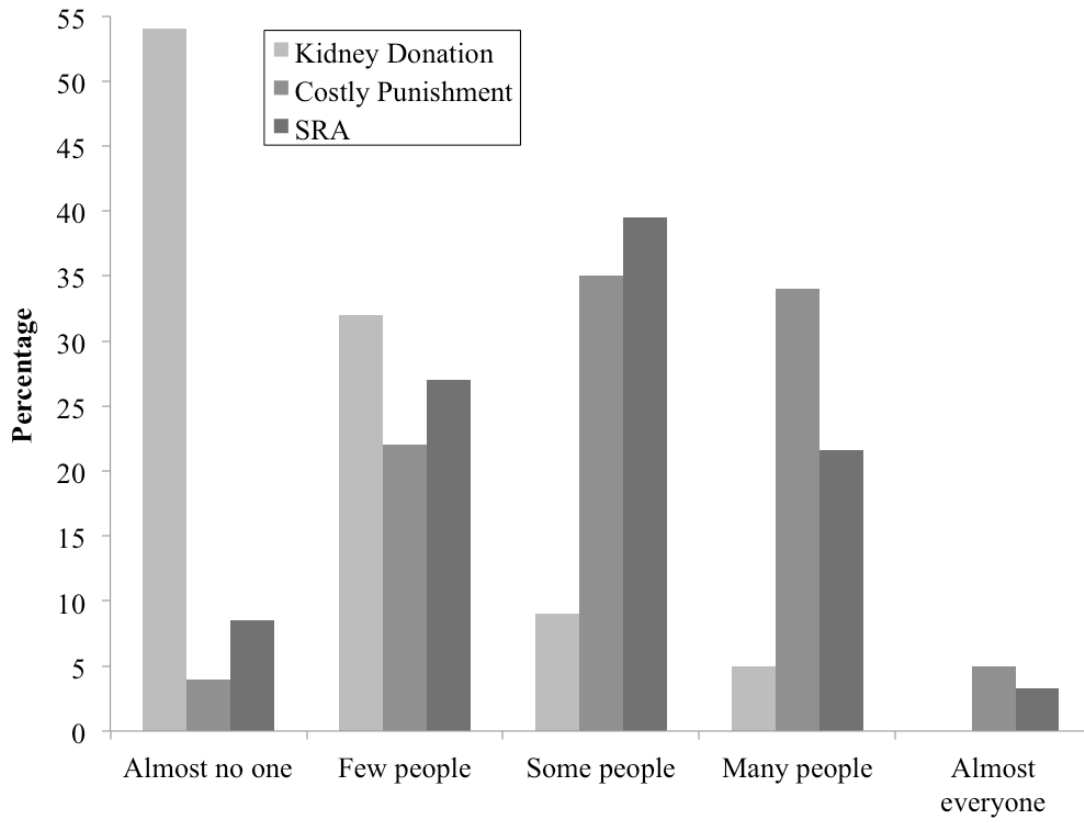

**Figure S3**

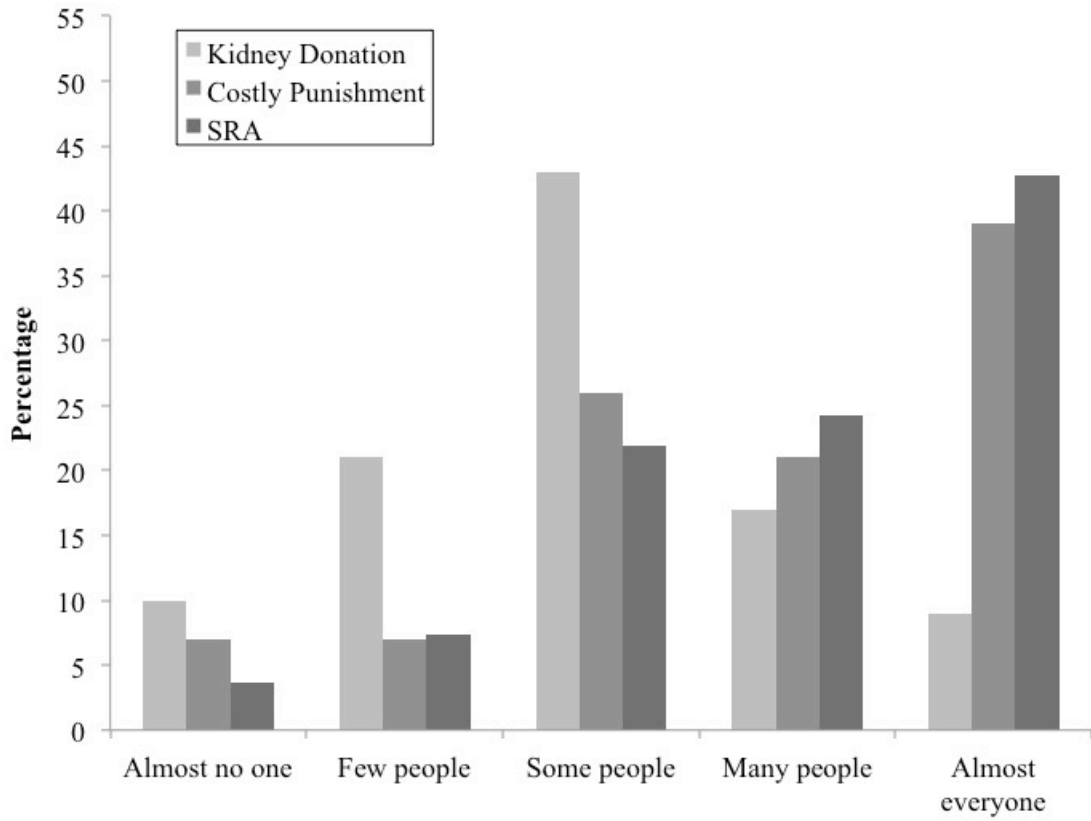

Supplement: srep18974-s1.pdf [file srep18974-s1.pdf]
